# Supplementary material
Source: PubMed Central journal article supplement (PMC4019104)
Supplement: JVI.03166-13_zjv999098963so1.pdf [file JVI.03166-13_zjv999098963so1.pdf]

## Supplementary Tables

**Table S1. Primers used in this study**

| Genes for qRT-PCR        |                  | Primers of the gene for qRT-PCR |
|--------------------------|------------------|---------------------------------|
| <i>ac81</i>              | Sense primer     | TGTCAGGCAACCAAATCATC            |
|                          | Antisense primer | CCTTTAGCATAATAGCCCATA           |
| <i>helicase</i>          | Sense primer     | TGAAATCGACAGCCAGTG              |
|                          | Antisense primer | ATCGGTCATCTGAAAGTGC             |
| <i>38k</i>               | Sense primer     | TTGGCAAATGACCGACAC              |
|                          | Antisense primer | AGCCATGCGACCAAAGTA              |
| <i>dnapol</i>            | Sense primer     | AGCTTGGCGTGAGATGGT              |
|                          | Antisense primer | AAAGTCCCGACCGAGTTT              |
| <i>lef9</i>              | Sense primer     | ATGTACGTGTTTCGGTGCAA            |
|                          | Antisense primer | ACTGTTCTCGCCACAAAG              |
| <i>pif4</i>              | Sense primer     | CCGGCTATTCAAGTGTTTG             |
|                          | Antisense primer | GCTGGCAATCTAATGTAAGG            |
| <i>flap endonuclease</i> | Sense primer     | CGTATTTTGGCTGCTCTTG             |
|                          | Antisense primer | CTGGTATCATAGGGGAACA             |
| <i>odv-e56</i>           | Sense primer     | GCTGCAGACACTATTTTCAGA           |
|                          | Antisense primer | GTTTGGCTGTGGCTTTCA              |

  

| Target scaffolds | Primers for PCR amplification |                       |
|------------------|-------------------------------|-----------------------|
| sc5052           | Sense primer                  | TTGGCAAATGACCGACAC    |
|                  | Antisense primer              | AGCTTGGCGTGAGATGGT    |
| c357974          | Sense primer                  | GAGACTCGCTTGTGCTTAT   |
|                  | Antisense primer              | TTGACCCAACCCGATTTAG   |
| c302951          | Sense primer                  | GCTCTGAACGATGGACTT    |
|                  | Antisense primer              | ATCACGAACGAAACCAACT   |
| c211476          | Sense primer                  | ATGCCCTACTATGAACGAC   |
|                  | Antisense primer              | TGATTTGCCTGTTAGATTGC  |
| c589636          | Sense primer                  | ACAACGGCCTACATTCATCA  |
|                  | Antisense primer              | TGTGTGTGTGTGTATATCTGT |
| c29512           | Sense primer                  | GCTGGCAATCTAATGTAAGG  |
|                  | Antisense primer              | ATCGGTCATCTGAAAGTGC   |
| sc88             | Sense primer                  | GAGACCACTGGGACATAC    |
|                  | Antisense primer              | GCTGCAGACACTATTTTCAGA |
| sc538            | Sense primer                  | TGGCAGCTAGAGACTACAG   |
|                  | Antisense primer              | CATTGGTGCCTGTTCTTTC   |

**Table S2. Phylogenetic congruence of the pif genes**

|                 | Sequences |       |       |       |
|-----------------|-----------|-------|-------|-------|
| Tree topologies | p74       | pif-1 | pif-2 | pif-3 |
| p74             | 0.85      | 0.81  | 0.71  | 0.48  |
| pif-1           | 0.66      | 0.88  | 0.23  | 0.28  |
| pif-2           | 0.47      | 0.71  | 0.91  | 0.75  |
| pif-3           | 0.88      | 0.63  | 0.87  | 0.89  |
| combined        | 0.85      | 0.88  | 0.91  | 0.48  |
